# Supplementary material for: Two species, one island: Retrospective analysis of threatened fauna translocations with divergent outcomes
Source: PLoS One. 2021 Jul 12;16(7):e0253962. doi: 10.1371/journal.pone.0253962 (PMC8274872; doi:10.1371/journal.pone.0253962)
Supplement: S1 Table — (XLSX) [file pone.0253962.s001.xlsx]

## Sheet: results_bestmodels_doole_gb_ope
Parameters	Group	Session	Date	lambda0 estimate	lambda0 SE	lambda0 lcl	lambda0 ucl	phi estimate	phi SE	phi lcl	phi ucl	D estimate	D SE	D lcl	D ucl	sigma estimate	sigma SE	sigma lcl	sigma ucl	Abundance estimate	Abundance lcl	Abundance ucl
lambda0~t phi~1 D~t sigma~t	Female	1	2011-07-01	0.0037	0.0009	0.0022	0.0061	0.9982	0.0002	0.9977	0.9986	0.2802	0.0765	0.164	0.4786	959.753	182.453	661.215	1393.08	72.3054	42.3311	123.504
	Female	2	2011-09-01	0.0025	0.0012	0.001	0.0064	0.9982	0.0002	0.9977	0.9986	0.5609	0.2399	0.2425	1.2974	479.392	77.9873	348.512	659.423	144.729	62.5741	334.747
	Female	3	2011-11-01	0.1811	0.089	0.0691	0.4748	0.9982	0.0002	0.9977	0.9986	0.3295	0.0731	0.2132	0.5091	70.3967	8.6084	55.3941	89.4625	85.0137	55.0139	131.373
	Female	4	2012-05-01	0.2081	0.0772	0.1005	0.4309	0.9982	0.0002	0.9977	0.9986	0.5103	0.1107	0.3334	0.781	76.0155	11.2313	56.9031	101.547	131.667	86.0355	201.502
	Female	5	2013-05-01	0.0347	unidentifiable	unidentifiable	unidentifiable	0.9982	0.0002	0.9977	0.9986	0.3608	0.023	0.3183	0.409	194.714	unidentifiable	unidentifiable	unidentifiable	93.102	82.1426	105.523
	Female	6	2015-04-01	0.0122	0.0028	0.0077	0.0194	0.9982	0.0002	0.9977	0.9986	0.2464	0.0427	0.1755	0.3462	879.374	208.771	552.193	1400.41	63.5964	45.2792	89.3235
	Female	7	2017-07-01	0.0123	0.0026	0.0082	0.0187	unidentifiable	unidentifiable	unidentifiable	unidentifiable	0.2675	0.0717	0.1582	0.4524	532.046	165.33	289.364	978.26	69.0319	40.8249	116.728
lambda0~Session phi~1 D~Session sigma~Session	Male	1	2011-07-01	0.0046	0.0006	0.0035	0.0061	0.9987	0.0001	0.9983	0.9991	0.273	0.0476	0.1938	0.3844	1277.05	153.077	1009.66	1615.25	70.4344	50.0211	99.1783
	Male	2	2011-09-01	0.0077	0.0008	0.0062	0.0095	0.9987	0.0001	0.9983	0.9991	0.3489	0.0413	0.2766	0.4402	779.532	76.6586	642.876	945.237	90.0358	71.3657	113.59
	Male	3	2011-11-01	0.0128	0.0011	0.0108	0.0153	0.9987	0.0001	0.9983	0.9991	0.446	0.0501	0.3579	0.5559	475.838	54.324	380.436	595.164	115.092	92.351	143.434
	Male	4	2012-05-01	0.0213	0.0018	0.018	0.0252	0.9987	0.0001	0.9983	0.9991	0.5702	0.0922	0.4153	0.7829	290.459	45.4243	213.78	394.641	147.122	107.153	201.999
	Male	5	2013-05-01	0.0354	0.0035	0.0291	0.0432	0.9987	0.0001	0.9983	0.9991	0.7289	0.1704	0.4609	1.1527	177.3	37.1661	117.565	267.387	188.065	118.917	297.421
	Male	6	2015-04-01	0.0589	0.0075	0.0458	0.0756	0.9987	0.0001	0.9983	0.9991	0.9317	0.292	0.5041	1.7221	108.227	28.9366	64.0839	182.777	240.402	130.071	444.319
	Male	7	2017-07-01	0.0978	0.0156	0.0714	0.134	unidentifiable	unidentifiable	unidentifiable	unidentifiable	1.1911	0.4715	0.5482	2.5877	66.0632	21.6191	34.786	125.463	307.305	141.448	667.64
